# Supplementary material
Source: publisher figshare collection journal article supplement (https://gsajournals.figshare.com/articles/dataset/_/6224552)
Supplement: Supplementary file 1 [file 1]

**Table S2. Primers used for this study.**

| Name | Sequence | Intention |
| --- | --- | --- |
| T7-gfdA-sgRNA1-F | TAATACGACTCACTATAGGGTGGCCGTAGTTGGCTCAGTTTTAGAGCTAGAAATAGCAA | for the DNA template of gfdA-sgRNA1(RNA); for deleting *gfdA* |
| sgRNA-R | AAAAAAGCACCGACTCGGTGCC | for the DNA template of sgRNA |
| gfdA-hph-F | AAAAAAGCACCGACTCGGTGCC | for the repair template of deleting *gfdA* |
| gfdA-hph-R | CACCTCCGGAAGCACAAGGTGGCCGTAGTTGGCGAATTCCCTTGTATCTCTACACACAG | for the repair template of deleting *gfdA* |
| gfdA-ptrA-F | CACCTCCGGAAGCACAAGGTGGCCGTAGTTGGCCATGGCAGACACTGAAGCAAC | for the repair template of deleting *gfdA* |
| gfdA-ptrA-R | CACAGCATCCACCACAGACGGGTTGGCGTGGGCCTAGATGGCCTCTTGCATC | for the repair template of deleting *gfdA* |
| gfdA-seq-F | CCGCTAACTCTCAGTTCTGCC | diagnostic primer for *ΔgfdA and gfdA-gfp* |
| gfdA-seq-R | CCACTCCGTCAGGTACAGAAC | diagnostic primer for *ΔgfdA* |
| T7-gfdB-sgRNA-F | TAATACGACTCACTATAGGGTCTTGAACACGGCTGCAGGTTTTAGAGCTAGAAATAGCA | for the DNA template of gfdB-sgRNA |
| gfdB-hph-F | CGATGACGTCGGTCTTGAACACGGCTGCGAATTCCCTTGTATCTCTACACACAGGC | for the repair template of deleting *gfdB* ORF |
| gfdB-hph-R | CTCGAGTGTCTTGTCGATGAACTCGAGTGGAGATGTGGAGTG | for the repair template of deleting *gfdB* ORF |
| gfdB-seq-F | CCATGGCTCTGTAATAATGCGC | diagnostic primer for *ΔgfdB* |
| gfdB-seq-R | CATTCCTACAGCCATGACTGCG | diagnostic primer for *ΔgfdB* |
| T7-glcA-sgRNA-F | TAATACGACTCACTATAGGGTCTTTCAGGTTGTCGCCTGTTTTAGAGCTAGAAATAGCA | for the DNA template of glcA-sgRNA |
| glcA-ptrA-F | CCGCTCGCTACTGCAAAATGAAAATCGCCGAGCATGGCAGACACTGAAGCAAC | for the repair template of deleting *glcA* ORF |
| glcA-ptrA-R | GATAGCCGGTAGTTCATCCGACCCCTCTTGCTCGCCTAGATGGCCTCTTGCATC | for the repair template of deleting *glcA* ORF |
| glcA-seq-F | ACTCACTTGCCGTCTACTTTCC | diagnostic primer for *ΔglcA* |
| glcA-seq-R | GAAACGCTCAAACGCAAGCACA | diagnostic primer for *ΔglcA* |
| T7-sakA-sgRNA-F | TAATACGACTCACTATAGGGTGGGAATGGGAGCCTTGTTTTAGAGCTAGAAATAGCAA | for the DNA template of sakA-sgRNA |
| sakA-hph-F | ATACAGATCTGCAACCGGTGGGAATGGGAGCCGAATTCCCTTGTATCTCTACACACAG | for the repair template of deleting *sakA* ORF |
| sakA-hph-R | GGGGCTCGGTAGTATCTCGTTGAAACATAGTCGAGTGGAGATGTGGAGTG | for the repair template of deleting *sakA* ORF |
| sakA-seq-F | TACTCCGTCCACCACCCACACTA | diagnostic primer for *ΔsakA* |
| sakA-seq-R | TCCCCGTCTACACAGACCAAAAG | diagnostic primer for *ΔsakA* |
| T7-gfdA-sgRNA2-F | TAATACGACTCACTATAGGGCGCCAGTCAGGCTGTCAGTTTTAGAGCTAGAAATAGCAA | for the DNA template of gfdA-sgRNA2; for *gfdA-GFP* |
| gfdA-gfp-hph-F | CCATGTCTGTTGAGTCTATTCCATCTTATATTGAGCGGGGAGCTGGTGCAGGCGCTGG | for the repair template of tagging GfdA with GFP |
| gfdA-gfp-hph-R | CCCCAAAGCAGGCTATCATAACCTGGCCATGAGAATTCCCTTGTATCTCTACACA | for the repair template of tagging GfdA with GFP |
| gfdA-GFP-seq-R | CCAAAGCAGGCTATCATAACC | diagnostic primer for *gfdA-GFP* |
| pyr4-SpeI-F | CCCTCACTAAAGGGACTAGTGGGTGTTGGCGGGTGT | for amplifing *pyr4* |
| pyr4-SpeI-R | TTTAAACCTGCAGGACTAGTTGAATGGCGAATGGCG | for amplifing *pyr4* |
| gfdA-revertant-F | AAGGGCAATTCGCGGCCCCCCCTTTGAGTGCGACCTCAA | for amplifing *gfdA* |
| gfdA-revertant-R | CGAATTGAATTTAGCGGCCGATGAAACAATGAATGCCCCC | for amplifing *gfdA* |
| gpd-gfdA-ATG-F | AACCTTTAATCAAGCTTATCGATATGGGCTCCCTATCACCGCAC | for amplifing the ORF and 3’UTR of gfdB |
| gfdA-BamHI-R | AATCAGCCTAGCTAGGATCCCTTCAATCTGTTCTATGCGCTG | for amplifing the ORF and 3’UTR of *gfdA* |
| gpd-gfdB-ATG-F | AACCTTTAATCAAGCTTATCGATATGACGTCGGTCTTGAACACG | for amplifing the ORF and 3’UTR of *gfdB* |
| gfdB-BamHI-R | AATCAGCCTAGCTAGGATCC  CCATTAGCTTCCTGGTGGTA | for amplifing the ORF and 3’UTR of *gfdB* |
| gpd-glcA-ATG-F | AACCTTTAATCAAGCTTATCGATATGCGAAACCCTTTCGATCTG | for amplifing the ORF and 3’UTR of *glcA* |
| glcA-BamHI-R | AATCAGCCTAGCTAGGATCC  CAGGTTGCTATTGATGCAGC | for amplifing the ORF and 3’UTR of *glcA* |
| gpd-BamHI-F | CGGTTATGCCGTATGGATCCGCATGCGGAGAGACGGACG | for amplifing the gpdA promoter |
| gfdA-seq-F | CCGCTAACTCTCAGTTCTGCTC | diagnostic primer binds the upstream of *gfdA* |
| gfdA-seq-R | CCACTCCGTCAGGTACAGAAC | diagnostic primer binds the downstream of *gfdA* |
| gfdA-GFP-seq-R | CCAAAGCAGGCTATCATAACC | diagnostic primer binds the downstream of *gfdA* |
| gfdB-seq-F | CCATGGCTCTGTAATAATGCGC | diagnostic primer binds the upstream of *gfdB* |
| gfdB-seq-R | CATTCCTACAGCCATGACTGCG | diagnostic primer binds the downstream of *gfdB* |
| SakA-seq-F | TACTCCGTCCACCACCCACACTA | diagnostic primer binds the upstream of *sakA* |
| SakA-seq-R | TCCCCGTCTACACAGACCAAAAG | diagnostic primer binds the downstream of *sakA* |
| GlcA-seq-F | ACTCACTTGCCGTCTACTTTCC | diagnostic primer binds the upstream of *glcA* |
| GlcA-seq-R | GAAACGCTCAAACGCAAGCACA | diagnostic primer binds the downstream of *glcA* |
| GfdA-exon-F | CTGCTATCGCTAAGATTGTC | RT-PCR primer for *gfdA* |
| GfdA-exon-R | AAGATGGGTCGTAGTGCCGG | RT-PCR primer for *gfdA* |
| GfdB-exon-F | GCAGATGTGGGTGTTCGAGG | RT-PCR primer for *gfdB* |
| GfdB-exon-R | TGCCAGGGAGGTACTTGACG | RT-PCR primer for *gfdB* |
| GlcA-exon-F | TTGAATGGAGTCGGGTTG | RT-PCR primer for *glcA* |
| GlcA-exon-R | CATGGCATCGAGAATAGCC | RT-PCR primer for *glcA* |
| gfdAprobeF | TAGCATTGAGAGGAAGCAGC | *gfdA* Probe primer |
| gfdAprobeR | GGACCTCCTCGAAGTAGAAC | *gfdA* Probe primer |
| gfdBprobeF | GTCATGGCTGTAGGAATGAC | *gfdB* Probe primer |
| gfdBprobeF | TCCTTCCTCGCTGTCCAGAC | *gfdB* Probe primer |
